# Supplementary material
Source: publisher site journal article supplement (https://www.dovepress.com/article/594695)
Supplement: Supplementary file 1 [file 594695%20Supplementary%20Material.docx]

**Table S1.** Comparisons of absolute HGS and normalized HGS measurements by participants’ characteristics

| **Variables** | **Male**  **n=1048 (48.1)** | | | | | **Female**  **n=1132 (51.9)** | | | | |
| --- | --- | --- | --- | --- | --- | --- | --- | --- | --- | --- |
| **n** | **Absolute HGS (kg)** | | **Normalized HGS (kgf/kg)** | | **n** | **Absolute HGS (kg)** | | **Normalized HGS (kgf/kg)** | |
| **Mean ± SD** | **p-value** | **Mean ± SD** | **p-value** | **Mean ± SD** | **p-value** | **Mean ± SD** | **p-value** |
| **Age group** |  |  |  |  |  |  |  |  |  |  |
| 60-64 years | 268 | 30.9 ± 6.6 | <0.001*** | 0.46 ± 0.11 | <0.001*** | 371 | 19.7 ± 4.8 | <0.001*** | 0.33 ± 0.09 | 0.001** |
| 65-69 years | 303 | 29.3 ± 6.1 |  | 0.47 ± 0.11 |  | 324 | 18.6 ± 4.7 |  | 0.33 ± 0.09 |  |
| 70-74 years | 263 | 28.1 ± 6.6 |  | 0.45 ± 0.12 |  | 228 | 17.8 ± 5.3 |  | 0.33 ± 0.11 |  |
| 75-79 years | 154 | 25.4 ± 6.5 |  | 0.42 ± 0.11 |  | 153 | 16.2 ± 4.7 |  | 0.32 ± 0.10 |  |
| ≥80 years | 60 | 22.3 ± 6.0 |  | 0.39 ± 0.11 |  | 56 | 13.1 ± 4.1 |  | 0.28 ± 0.09 |  |
| **BMI (kg/m2)** |  |  |  |  |  |  |  |  |  |  |
| <22 | 274 | 26.4 ± 6.6 | <0.001*** | 0.51 ± 0.12 | <0.001*** | 276 | 17.3 ± 5.2 | <0.001*** | 0.39 ± 0.11 | <0.001*** |
| 22-27 | 516 | 29.2 ± 6.6 |  | 0.45 ± 0.10 |  | 478 | 18.1 ± 5.0 |  | 0.33 ± 0.08 |  |
| >27 | 258 | 29.1 ± 7.0 |  | 0.37 ± 0.09 |  | 378 | 19.0 ± 5.0 |  | 0.28 ± 0.07 |  |
| **Cognitive status** |  |  |  |  |  |  |  |  |  |  |
| Without MCI | 869 | 28.5 ± 6.7 | 0.677 | 0.45 ± 0.11 | 0.324 | 991 | 18.2 ± 5.0 | 0.836 | 0.33 ± 0.09 | 0.282 |
| MCI | 179 | 28.2 ± 7.3 |  | 0.44 ± 0.12 |  | 141 | 18.1 ± 5.4 |  | 0.32 ±0.11 |  |
| **Medical History** |  |  |  |  |  |  |  |  |  |  |
| Hypertension |  |  |  |  |  |  |  |  |  |  |
| Yes | 488 | 28.3 ± 6.8 | 0.483 | 0.43 ± 0.11 | <0.001*** | 601 | 17.9 ± 5.0 | 0.010* | 0.31 ± 0.09 | <0.001*** |
| No | 560 | 28.6 ± 6.8 |  | 0.47 ± 0.11 |  | 531 | 18.6 ± 5.2 |  | 0.35 ± 0.10 |  |
| Hypercholesterolemia |  |  |  |  |  |  |  |  |  |  |
| Yes | 283 | 29.1 ± 6.7 | 0.053 | 0.43 ± 0.11 | <0.001*** | 378 | 18.4 ± 5.0 | 0.371 | 0.32 ± 0.09 | 0.014* |
| No | 765 | 28.2 ± 6.8 |  | 0.46 ± 0.12 |  | 754 | 18.1 ± 5.1 |  | 0.33 ± 0.10 |  |
| Diabetes mellitus |  |  |  |  |  |  |  |  |  |  |
| Yes | 278 | 28.3 ± 6.9 | 0.759 | 0.43 ± 0.11 | <0.001*** | 288 | 17.5 ± 4.6 | 0.010* | 0.30 ± 0.09 | <0.001*** |
| No | 770 | 28.5 ± 6.8 |  | 0.46 ± 0.12 |  | 844 | 18.4 ± 5.2 |  | 0.33 ± 0.10 |  |
| Cardiovascular disease |  |  |  |  |  |  |  |  |  |  |
| Yes | 139 | 27.6 ± 6.9 | 0.106 | 0.43 ± 0.13 | 0.014* | 88 | 17.7 ± 5.0 | 0.288 | 0.31 ± 0.09 | 0.050 |
| No | 909 | 28.6 ± 6.8 |  | 0.45 ± 0.11 |  | 1044 | 18.3 ± 5.1 |  | 0.33 ± 0.10 |  |
| Cataract/Glaucoma |  |  |  |  |  |  |  |  |  |  |
| Yes | 91 | 27.6 ± 7.2 | 0.237 | 0.42 ± 0.12 | 0.011* | 106 | 18.3 ± 5.9 | 0.797 | 0.32 ± 0.12 | 0.539 |
| No | 957 | 28.5 ± 6.8 |  | 0.45 ± 0.11 |  | 1026 | 18.2 ± 5.0 |  | 0.33 ± 0.10 |  |
| Joint pain |  |  |  |  |  |  |  |  |  |  |
| Yes | 228 | 27.4 ± 7.0 | 0.008** | 0.42 ± 0.12 | <0.001*** | 311 | 17.8 ± 5.3 | 0.125 | 0.31 ± 0.10 | <0.001*** |
| No | 820 | 28.7 ± 6.7 |  | 0.46 ± 0.11 |  | 821 | 18.4 ± 5.0 |  | 0.33 ± 0.10 |  |
| Gout |  |  |  |  |  |  |  |  |  |  |
| Yes | 69 | 27.4 ± 8.0 | 0.197 | 0.39 ± 0.11 | <0.001*** | 26 | 17.9 ± 5.7 | 0.771 | 0.31 ± 0.09 | 0.285 |
| No | 979 | 28.5 ± 6.7 |  | 0.45 ± 0.11 |  | 1106 | 18.2 ± 5.1 |  | 0.33 ± 0.10 |  |
| **Multimorbidity** |  |  |  |  |  |  |  |  |  |  |
| No | 247 | 29.1 ± 6.4 | 0.237 | 0.49 ± 0.11 | <0.001*** | 252 | 18.8 ± 5.2 | 0.120 | 0.35 ± 0.10 | <0.001*** |
| 1 disease | 278 | 28.3 ± 6.8 |  | 0.46 ± 0.11 |  | 290 | 18.2 ± 4.9 |  | 0.33 ± 0.10 |  |
| ≥ 2 diseases | 523 | 28.2 ± 7.0 |  | 0.43 ± 0.11 |  | 590 | 18.0 ± 5.1 |  | 0.31 ± 0.09 |  |
| **Falls status** |  |  |  |  |  |  |  |  |  |  |
| No fall | 890 | 28.6 ± 6.7 | 0.050 | 0.45 ± 0.11 | 0.002** | 884 | 18.3 ± 5.1 | 0.492 | 0.33 ± 0.10 | 0.173 |
| 1 fall | 95 | 27.2 ± 7.2 |  | 0.43 ± 0.12 |  | 126 | 17.8 ± 4.9 |  | 0.31 ± 0.08 |  |
| ≥ 2 falls | 63 | 27.2 ± 7.1 |  | 0.41 ± 0.12 |  | 122 | 18.0 ± 5.0 |  | 0.33 ± 0.10 |  |
| **WHODAS 2.0** |  |  |  |  |  |  |  |  |  |  |
| No disability | 423 | 29.7 ± 6.3 | <0.001*** | 0.47 ± 0.11 | <0.001*** | 359 | 19.0 ± 4.6 | <0.001*** | 0.34 ± 0.09 | <0.001*** |
| Mild disability | 226 | 28.7 ± 6.4 |  | 0.45 ± 0.11 |  | 256 | 18.6 ± 5.2 |  | 0.33 ± 0.09 |  |
| Moderate disability | 140 | 26.4 ± 6.6 |  | 0.43 ± 0.11 |  | 160 | 17.5 ± 5.0 |  | 0.31 ± 0.10 |  |
| Severe disability | 241 | 26.9 ±7.7 |  | 0.43 ± 0.12 |  | 327 | 17.5 ± 5.0 |  | 0.31 ± 0.10 |  |
| **IADL** |  |  |  |  |  |  |  |  |  |  |
| No impairment (14) | 531 | 29.6 ± 6.6 | <0.001*** | 0.45 ± 0.11 | 0.026* | 472 | 19.3 ± 4.8 | <0.001*** | 0.33 ± 0.09 | 0.005** |
| Mild impairment (10 -13) | 440 | 27.7 ± 6.5 |  | 0.45 ± 0.12 |  | 499 | 18.1 ± 5.1 |  | 0.33 ± 0.10 |  |
| Moderately – severe impairment (<10) | 64 | 23.3 ± 6.6 |  | 0.41 ± 0.12 |  | 146 | 15.4 ± 4.6 |  | 0.30 ± 0.10 |  |
| **Lifestyle activities** |  |  |  |  |  |  |  |  |  |  |
| Q1 | 259 | 31.0 ± 6.2 | <0.001*** | 0.47 ± 0.11 | 0.001** | 279 | 19.8 ± 4.7 | <0.001*** | 0.34 ± 0.09 | 0.012* |
| Q2 | 260 | 28.5 ± 6.7 |  | 0.45 ± 0.12 |  | 280 | 18.6 ± 4.9 |  | 0.33 ± 0.10 |  |
| Q3 | 260 | 27.9 ± 6.6 |  | 0.45 ± 0.11 |  | 280 | 17.9 ± 4.9 |  | 0.32 ± 0.09 |  |
| Q4 | 260 | 26.1 ± 6.8 |  | 0.43 ± 0.12 |  | 280 | 16.7 ± 5.3 |  | 0.32 ± 0.10 |  |

Notes: *p<0.05, **p<0.01, ***p<0.001

Abbreviation: BMI, body mass index; HGS, hand grid strength; IADL, instrumental activities of daily living; MCI, mild cognitive impairment; WHODAS 2.0, World Health Organization Disability Assessment Schedule 2.0.

**Table S2.** The effects of age and sex on absolute HGS and normalized HGS

| **Variables** | **Unadjusted model** | | | | | **Adjusted model** | | | |
| --- | --- | --- | --- | --- | --- | --- | --- | --- | --- |
| **df** | **F** | **p-value** | **Partial Eta Squared** | **df** | | **F** | **p-value** | **Partial Eta Squared** |
| **Absolute HGSa** |  |  |  |  |  | |  |  |  |
| Sex | 1 | 1172.68 | <0.001*** | 0.351 | 1 | | 1042.05 | <0.001*** | 0.335 |
| Age | 4 | 66.21 | <0.001*** | 0.109 | 4 | | 29.26 | <0.001*** | 0.053 |
| Age*Sex | 4 | 2.09 | 0.079 | 0.004 | 4 | | 3.46 | 0.008** | 0.007 |
| **Normalized HGSb** |  |  |  |  |  | |  |  |  |
| Sex | 1 | 491.28 | <0.001*** | 0.185 | 1 | | 476.72 | <0.001*** | 0.188 |
| Age | 4 | 12.26 | <0.001*** | 0.022 | 4 | | 14.33 | <0.001*** | 0.027 |
| Age*Sex | 4 | 1.79 | 0.128 | 0.003 | 4 | | 1.22 | 0.302 | 0.002 |

Notes: **p<0.01; ***p<0.001

Abbreviation: HGS, hand grid strength

aAdjusted for BMI categories, statuses of hypertension, diabetes mellitus, joint pain, WHODAS 2.0, IADL and lifestyle activities.

bAdjusted for BMI categories and statuses of hypertension, hypercholesterolemia, diabetes mellitus, cardiovascular disease, cataract/glaucoma, joint pain, gout, multimorbidity, falls, WHODAS 2.0, IADL and lifestyle activities.

**Table S3.** The estimated absolute HGS percentile in Malaysian older adults, stratified by sex and age using the LMS method.

| **Age** | **Percentile** | | | | | | | | | | | | |
| --- | --- | --- | --- | --- | --- | --- | --- | --- | --- | --- | --- | --- | --- |
| **5** | **10** | **20** | **25** | **30** | **40** | **50** | **60** | **70** | **75** | **80** | **90** | **95** |
| **Male** |  |  |  |  |  |  |  |  |  |  |  |  |  |
| 60 | 21.5 | 24.0 | 26.8 | 27.8 | 28.7 | 30.3 | 31.9 | 33.4 | 35.1 | 36.0 | 37.1 | 40.0 | 42.7 |
| 61 | 21.1 | 23.5 | 26.3 | 27.3 | 28.3 | 29.9 | 31.4 | 32.9 | 34.6 | 35.5 | 36.6 | 39.5 | 42.1 |
| 62 | 20.7 | 23.1 | 25.9 | 26.9 | 27.8 | 29.5 | 31.0 | 32.5 | 34.2 | 35.1 | 36.2 | 39.1 | 41.6 |
| 63 | 20.2 | 22.7 | 25.5 | 26.5 | 27.4 | 29.1 | 30.6 | 32.1 | 33.8 | 34.7 | 35.8 | 38.6 | 41.2 |
| 64 | 19.9 | 22.3 | 25.1 | 26.1 | 27.0 | 28.7 | 30.2 | 31.8 | 33.4 | 34.3 | 35.4 | 38.3 | 40.8 |
| 65 | 19.5 | 21.9 | 24.7 | 25.8 | 26.7 | 28.3 | 29.9 | 31.4 | 33.1 | 34.0 | 35.1 | 37.9 | 40.4 |
| 66 | 19.1 | 21.6 | 24.4 | 25.5 | 26.4 | 28.0 | 29.6 | 31.1 | 32.8 | 33.7 | 34.7 | 37.6 | 40.1 |
| 67 | 18.8 | 21.3 | 24.1 | 25.2 | 26.1 | 27.7 | 29.3 | 30.8 | 32.5 | 33.4 | 34.5 | 37.3 | 39.8 |
| 68 | 18.5 | 21.0 | 23.8 | 24.9 | 25.8 | 27.5 | 29.0 | 30.6 | 32.2 | 33.2 | 34.2 | 37.0 | 39.5 |
| 69 | 18.2 | 20.6 | 23.5 | 24.6 | 25.5 | 27.2 | 28.7 | 30.3 | 32.0 | 32.9 | 34.0 | 36.8 | 39.2 |
| 70 | 17.8 | 20.3 | 23.2 | 24.3 | 25.2 | 26.9 | 28.5 | 30.0 | 31.7 | 32.6 | 33.7 | 36.5 | 38.9 |
| 71 | 17.5 | 20.0 | 22.9 | 23.9 | 24.9 | 26.6 | 28.1 | 29.7 | 31.4 | 32.3 | 33.3 | 36.1 | 38.5 |
| 72 | 17.1 | 19.6 | 22.5 | 23.6 | 24.5 | 26.2 | 27.8 | 29.3 | 31.0 | 31.9 | 33.0 | 35.8 | 38.1 |
| 73 | 16.7 | 19.2 | 22.1 | 23.2 | 24.1 | 25.8 | 27.4 | 28.9 | 30.6 | 31.5 | 32.6 | 35.3 | 37.7 |
| 74 | 16.3 | 18.8 | 21.7 | 22.8 | 23.7 | 25.4 | 27.0 | 28.5 | 30.2 | 31.1 | 32.1 | 34.9 | 37.2 |
| 75 | 15.9 | 18.4 | 21.3 | 22.3 | 23.3 | 24.9 | 26.5 | 28.0 | 29.7 | 30.6 | 31.6 | 34.3 | 36.6 |
| 76 | 15.4 | 17.9 | 20.8 | 21.8 | 22.8 | 24.5 | 26.0 | 27.5 | 29.2 | 30.1 | 31.1 | 33.8 | 36.0 |
| 77 | 15.0 | 17.5 | 20.3 | 21.4 | 22.3 | 24.0 | 25.5 | 27.0 | 28.6 | 29.5 | 30.5 | 33.2 | 35.4 |
| 78 | 14.5 | 17.0 | 19.8 | 20.9 | 21.8 | 23.5 | 25.0 | 26.5 | 28.1 | 29.0 | 30.0 | 32.6 | 34.8 |
| 79 | 14.1 | 16.6 | 19.4 | 20.4 | 21.3 | 23.0 | 24.5 | 26.0 | 27.6 | 28.4 | 29.4 | 32.0 | 34.2 |
| 80 | 13.7 | 16.1 | 18.9 | 20.0 | 20.9 | 22.5 | 24.0 | 25.5 | 27.0 | 27.9 | 28.9 | 31.4 | 33.6 |
| 81 | 13.3 | 15.7 | 18.5 | 19.5 | 20.4 | 22.0 | 23.5 | 25.0 | 26.5 | 27.4 | 28.3 | 30.9 | 33.0 |
| 82 | 12.9 | 15.3 | 18.1 | 19.1 | 20.0 | 21.6 | 23.1 | 24.5 | 26.0 | 26.9 | 27.8 | 30.3 | 32.4 |
| 83 | 12.5 | 14.9 | 17.6 | 18.7 | 19.6 | 21.1 | 22.6 | 24.0 | 25.6 | 26.4 | 27.3 | 29.8 | 31.8 |
| 84 | 12.1 | 14.5 | 17.2 | 18.2 | 19.1 | 20.7 | 22.2 | 23.6 | 25.1 | 25.9 | 26.8 | 29.2 | 31.3 |
| 85 | 11.7 | 14.1 | 16.8 | 17.8 | 18.7 | 20.3 | 21.7 | 23.1 | 24.6 | 25.4 | 26.4 | 28.7 | 30.7 |
| 86 | 11.4 | 13.7 | 16.5 | 17.5 | 18.3 | 19.9 | 21.3 | 22.7 | 24.2 | 25.0 | 25.9 | 28.2 | 30.2 |
| 87 | 11.0 | 13.4 | 16.1 | 17.1 | 17.9 | 19.5 | 20.9 | 22.3 | 23.7 | 24.5 | 25.4 | 27.7 | 29.6 |
| 88 | 10.7 | 13.0 | 15.7 | 16.7 | 17.6 | 19.1 | 20.5 | 21.9 | 23.3 | 24.1 | 25.0 | 27.3 | 29.1 |
| 89 | 10.4 | 12.7 | 15.4 | 16.3 | 17.2 | 18.7 | 20.1 | 21.5 | 22.9 | 23.7 | 24.5 | 26.8 | 28.6 |
| 90 | 10.0 | 12.4 | 15.0 | 16.0 | 16.8 | 18.3 | 19.7 | 21.0 | 22.5 | 23.2 | 24.1 | 26.3 | 28.1 |
| **Female** |  |  |  |  |  |  |  |  |  |  |  |  |  |
| 60 | 12.4 | 14.1 | 16.2 | 16.9 | 17.6 | 18.8 | 20.0 | 21.2 | 22.4 | 23.1 | 23.9 | 26.1 | 28.0 |
| 61 | 12.2 | 13.9 | 16.0 | 16.7 | 17.4 | 18.7 | 19.8 | 21.0 | 22.2 | 22.9 | 23.7 | 25.9 | 27.9 |
| 62 | 12.0 | 13.7 | 15.8 | 16.6 | 17.2 | 18.5 | 19.6 | 20.8 | 22.0 | 22.7 | 23.5 | 25.7 | 27.7 |
| 63 | 11.8 | 13.6 | 15.6 | 16.4 | 17.0 | 18.3 | 19.4 | 20.6 | 21.9 | 22.6 | 23.4 | 25.6 | 27.5 |
| 64 | 11.6 | 13.4 | 15.4 | 16.2 | 16.9 | 18.1 | 19.2 | 20.4 | 21.7 | 22.4 | 23.2 | 25.4 | 27.4 |
| 65 | 11.4 | 13.2 | 15.2 | 16.0 | 16.7 | 17.9 | 19.0 | 20.2 | 21.5 | 22.2 | 23.0 | 25.2 | 27.2 |
| 66 | 11.2 | 12.9 | 15.0 | 15.8 | 16.5 | 17.7 | 18.8 | 20.0 | 21.3 | 22.0 | 22.8 | 25.0 | 27.0 |
| 67 | 11.0 | 12.7 | 14.8 | 15.6 | 16.3 | 17.5 | 18.6 | 19.8 | 21.1 | 21.8 | 22.6 | 24.8 | 26.8 |
| 68 | 10.8 | 12.5 | 14.6 | 15.4 | 16.0 | 17.3 | 18.4 | 19.6 | 20.9 | 21.6 | 22.4 | 24.6 | 26.6 |
| 69 | 10.5 | 12.3 | 14.4 | 15.1 | 15.8 | 17.1 | 18.2 | 19.4 | 20.6 | 21.4 | 22.2 | 24.4 | 26.4 |
| 70 | 10.3 | 12.1 | 14.1 | 14.9 | 15.6 | 16.8 | 18.0 | 19.1 | 20.4 | 21.1 | 21.9 | 24.2 | 26.2 |
| 71 | 10.1 | 11.8 | 13.9 | 14.7 | 15.3 | 16.6 | 17.7 | 18.9 | 20.1 | 20.9 | 21.7 | 23.9 | 25.9 |
| 72 | 9.8 | 11.6 | 13.6 | 14.4 | 15.1 | 16.3 | 17.4 | 18.6 | 19.9 | 20.6 | 21.4 | 23.6 | 25.6 |
| 73 | 9.6 | 11.3 | 13.4 | 14.1 | 14.8 | 16.0 | 17.1 | 18.3 | 19.5 | 20.3 | 21.1 | 23.3 | 25.3 |
| 74 | 9.3 | 11.0 | 13.1 | 13.8 | 14.5 | 15.7 | 16.8 | 18.0 | 19.2 | 19.9 | 20.7 | 22.9 | 25.0 |
| 75 | 9.0 | 10.7 | 12.8 | 13.5 | 14.2 | 15.4 | 16.5 | 17.6 | 18.9 | 19.6 | 20.4 | 22.6 | 24.6 |
| 76 | 8.7 | 10.5 | 12.4 | 13.2 | 13.8 | 15.0 | 16.1 | 17.3 | 18.5 | 19.2 | 20.0 | 22.2 | 24.2 |
| 77 | 8.4 | 10.2 | 12.1 | 12.9 | 13.5 | 14.7 | 15.8 | 16.9 | 18.1 | 18.8 | 19.6 | 21.8 | 23.8 |
| 78 | 8.2 | 9.9 | 11.8 | 12.6 | 13.2 | 14.4 | 15.5 | 16.6 | 17.8 | 18.5 | 19.2 | 21.4 | 23.4 |
| 79 | 7.9 | 9.6 | 11.5 | 12.3 | 12.9 | 14.1 | 15.1 | 16.2 | 17.4 | 18.1 | 18.9 | 21.0 | 23.0 |
| 80 | 7.6 | 9.3 | 11.2 | 12.0 | 12.6 | 13.7 | 14.8 | 15.9 | 17.1 | 17.8 | 18.5 | 20.7 | 22.7 |
| 81 | 7.4 | 9.1 | 11.0 | 11.7 | 12.3 | 13.4 | 14.5 | 15.6 | 16.7 | 17.4 | 18.2 | 20.3 | 22.3 |
| 82 | 7.1 | 8.8 | 10.7 | 11.4 | 12.0 | 13.1 | 14.2 | 15.3 | 16.4 | 17.1 | 17.9 | 20.0 | 22.0 |
| 83 | 6.9 | 8.6 | 10.4 | 11.1 | 11.8 | 12.9 | 13.9 | 15.0 | 16.1 | 16.8 | 17.5 | 19.7 | 21.6 |
| 84 | 6.7 | 8.3 | 10.2 | 10.9 | 11.5 | 12.6 | 13.6 | 14.7 | 15.8 | 16.5 | 17.3 | 19.4 | 21.3 |
| 85 | 6.5 | 8.1 | 10.0 | 10.6 | 11.3 | 12.4 | 13.4 | 14.4 | 15.6 | 16.2 | 17.0 | 19.1 | 21.1 |
| 86 | 6.3 | 7.9 | 9.7 | 10.4 | 11.0 | 12.1 | 13.1 | 14.2 | 15.3 | 16.0 | 16.7 | 18.8 | 20.8 |
| 87 | 6.0 | 7.7 | 9.5 | 10.2 | 10.8 | 11.9 | 12.9 | 13.9 | 15.1 | 15.7 | 16.4 | 18.6 | 20.6 |
| 88 | 5.8 | 7.4 | 9.3 | 10.0 | 10.6 | 11.6 | 12.7 | 13.7 | 14.8 | 15.5 | 16.2 | 18.3 | 20.3 |
| 89 | 5.7 | 7.2 | 9.1 | 9.7 | 10.3 | 11.4 | 12.4 | 13.4 | 14.6 | 15.2 | 16.0 | 18.1 | 20.1 |
| 90 | 5.5 | 7.0 | 8.9 | 9.5 | 10.1 | 11.2 | 12.2 | 13.2 | 14.3 | 15.0 | 15.7 | 17.8 | 19.8 |

Notes: HGS data are presented in kg.

**Table S4.** The estimated normalized HGS percentile in Malaysian older adults, stratified by sex and age using the LMS method.

| **Age** | **Percentile** | | | | | | | | | | | | |
| --- | --- | --- | --- | --- | --- | --- | --- | --- | --- | --- | --- | --- | --- |
| **5** | **10** | **20** | **25** | **30** | **40** | **50** | **60** | **70** | **75** | **80** | **90** | **95** |
| **Male** |  |  |  |  |  |  |  |  |  |  |  |  |  |
| 60 | 0.282 | 0.323 | 0.374 | 0.393 | 0.410 | 0.440 | 0.469 | 0.498 | 0.529 | 0.546 | 0.565 | 0.615 | 0.656 |
| 61 | 0.281 | 0.322 | 0.373 | 0.392 | 0.409 | 0.439 | 0.468 | 0.497 | 0.528 | 0.545 | 0.564 | 0.614 | 0.655 |
| 62 | 0.280 | 0.321 | 0.371 | 0.390 | 0.408 | 0.438 | 0.467 | 0.496 | 0.527 | 0.544 | 0.563 | 0.613 | 0.654 |
| 63 | 0.279 | 0.320 | 0.370 | 0.389 | 0.406 | 0.437 | 0.466 | 0.495 | 0.525 | 0.543 | 0.561 | 0.611 | 0.653 |
| 64 | 0.278 | 0.319 | 0.369 | 0.388 | 0.405 | 0.436 | 0.465 | 0.493 | 0.524 | 0.541 | 0.560 | 0.610 | 0.651 |
| 65 | 0.277 | 0.318 | 0.368 | 0.387 | 0.404 | 0.435 | 0.463 | 0.492 | 0.523 | 0.540 | 0.559 | 0.609 | 0.650 |
| 66 | 0.275 | 0.317 | 0.366 | 0.385 | 0.402 | 0.433 | 0.462 | 0.490 | 0.521 | 0.538 | 0.557 | 0.607 | 0.648 |
| 67 | 0.274 | 0.315 | 0.365 | 0.384 | 0.401 | 0.431 | 0.460 | 0.489 | 0.519 | 0.536 | 0.555 | 0.605 | 0.646 |
| 68 | 0.272 | 0.313 | 0.363 | 0.381 | 0.398 | 0.429 | 0.458 | 0.486 | 0.517 | 0.534 | 0.553 | 0.603 | 0.644 |
| 69 | 0.269 | 0.310 | 0.360 | 0.379 | 0.396 | 0.427 | 0.455 | 0.484 | 0.515 | 0.532 | 0.550 | 0.600 | 0.641 |
| 70 | 0.267 | 0.308 | 0.357 | 0.376 | 0.393 | 0.424 | 0.453 | 0.481 | 0.512 | 0.529 | 0.548 | 0.597 | 0.638 |
| 71 | 0.264 | 0.305 | 0.354 | 0.373 | 0.390 | 0.421 | 0.449 | 0.478 | 0.509 | 0.526 | 0.544 | 0.594 | 0.635 |
| 72 | 0.261 | 0.302 | 0.351 | 0.370 | 0.387 | 0.418 | 0.446 | 0.475 | 0.505 | 0.522 | 0.541 | 0.591 | 0.632 |
| 73 | 0.257 | 0.298 | 0.348 | 0.366 | 0.383 | 0.414 | 0.443 | 0.471 | 0.502 | 0.519 | 0.537 | 0.587 | 0.628 |
| 74 | 0.253 | 0.294 | 0.344 | 0.363 | 0.380 | 0.410 | 0.439 | 0.467 | 0.498 | 0.515 | 0.533 | 0.583 | 0.624 |
| 75 | 0.249 | 0.290 | 0.340 | 0.359 | 0.375 | 0.406 | 0.434 | 0.463 | 0.493 | 0.510 | 0.529 | 0.579 | 0.620 |
| 76 | 0.245 | 0.286 | 0.335 | 0.354 | 0.371 | 0.402 | 0.430 | 0.459 | 0.489 | 0.506 | 0.525 | 0.574 | 0.615 |
| 77 | 0.241 | 0.281 | 0.331 | 0.350 | 0.367 | 0.397 | 0.425 | 0.454 | 0.484 | 0.501 | 0.520 | 0.570 | 0.610 |
| 78 | 0.236 | 0.277 | 0.326 | 0.345 | 0.362 | 0.392 | 0.421 | 0.449 | 0.480 | 0.497 | 0.515 | 0.565 | 0.606 |
| 79 | 0.231 | 0.272 | 0.322 | 0.340 | 0.357 | 0.388 | 0.416 | 0.444 | 0.475 | 0.492 | 0.511 | 0.560 | 0.601 |
| 80 | 0.227 | 0.268 | 0.317 | 0.336 | 0.352 | 0.383 | 0.411 | 0.440 | 0.470 | 0.487 | 0.506 | 0.555 | 0.596 |
| 81 | 0.222 | 0.263 | 0.312 | 0.331 | 0.348 | 0.378 | 0.407 | 0.435 | 0.465 | 0.482 | 0.501 | 0.550 | 0.591 |
| 82 | 0.218 | 0.258 | 0.308 | 0.326 | 0.343 | 0.373 | 0.402 | 0.430 | 0.461 | 0.477 | 0.496 | 0.545 | 0.586 |
| 83 | 0.213 | 0.254 | 0.303 | 0.322 | 0.338 | 0.369 | 0.397 | 0.425 | 0.456 | 0.473 | 0.491 | 0.540 | 0.581 |
| 84 | 0.208 | 0.249 | 0.298 | 0.317 | 0.334 | 0.364 | 0.392 | 0.421 | 0.451 | 0.468 | 0.486 | 0.536 | 0.576 |
| 85 | 0.204 | 0.244 | 0.293 | 0.312 | 0.329 | 0.359 | 0.387 | 0.416 | 0.446 | 0.463 | 0.481 | 0.531 | 0.571 |
| 86 | 0.199 | 0.239 | 0.288 | 0.307 | 0.324 | 0.354 | 0.382 | 0.411 | 0.441 | 0.458 | 0.476 | 0.525 | 0.566 |
| 87 | 0.194 | 0.234 | 0.284 | 0.302 | 0.319 | 0.349 | 0.377 | 0.406 | 0.436 | 0.453 | 0.471 | 0.520 | 0.561 |
| 88 | 0.189 | 0.229 | 0.279 | 0.297 | 0.314 | 0.344 | 0.372 | 0.401 | 0.431 | 0.447 | 0.466 | 0.515 | 0.556 |
| 89 | 0.184 | 0.225 | 0.273 | 0.292 | 0.309 | 0.339 | 0.367 | 0.395 | 0.426 | 0.442 | 0.461 | 0.510 | 0.550 |
| 90 | 0.179 | 0.220 | 0.268 | 0.287 | 0.304 | 0.334 | 0.362 | 0.390 | 0.420 | 0.437 | 0.456 | 0.505 | 0.545 |
| **Female** |  |  |  |  |  |  |  |  |  |  |  |  |  |
| 60 | 0.193 | 0.221 | 0.254 | 0.267 | 0.279 | 0.301 | 0.322 | 0.345 | 0.369 | 0.384 | 0.400 | 0.448 | 0.491 |
| 61 | 0.192 | 0.220 | 0.254 | 0.267 | 0.279 | 0.301 | 0.323 | 0.345 | 0.370 | 0.384 | 0.401 | 0.448 | 0.492 |
| 62 | 0.191 | 0.219 | 0.254 | 0.267 | 0.279 | 0.302 | 0.323 | 0.346 | 0.371 | 0.385 | 0.402 | 0.449 | 0.492 |
| 63 | 0.190 | 0.218 | 0.253 | 0.267 | 0.279 | 0.302 | 0.324 | 0.346 | 0.371 | 0.386 | 0.402 | 0.450 | 0.493 |
| 64 | 0.188 | 0.217 | 0.253 | 0.267 | 0.279 | 0.302 | 0.324 | 0.347 | 0.372 | 0.386 | 0.403 | 0.450 | 0.494 |
| 65 | 0.187 | 0.216 | 0.253 | 0.266 | 0.279 | 0.302 | 0.324 | 0.347 | 0.372 | 0.387 | 0.404 | 0.451 | 0.494 |
| 66 | 0.185 | 0.215 | 0.252 | 0.266 | 0.279 | 0.302 | 0.324 | 0.347 | 0.373 | 0.388 | 0.404 | 0.451 | 0.495 |
| 67 | 0.184 | 0.214 | 0.251 | 0.266 | 0.279 | 0.302 | 0.325 | 0.348 | 0.373 | 0.388 | 0.405 | 0.452 | 0.495 |
| 68 | 0.182 | 0.213 | 0.251 | 0.265 | 0.278 | 0.302 | 0.324 | 0.348 | 0.373 | 0.388 | 0.405 | 0.452 | 0.495 |
| 69 | 0.180 | 0.212 | 0.250 | 0.264 | 0.278 | 0.301 | 0.324 | 0.347 | 0.373 | 0.388 | 0.405 | 0.452 | 0.495 |
| 70 | 0.178 | 0.210 | 0.249 | 0.263 | 0.277 | 0.301 | 0.324 | 0.347 | 0.373 | 0.387 | 0.404 | 0.451 | 0.494 |
| 71 | 0.175 | 0.208 | 0.247 | 0.262 | 0.276 | 0.300 | 0.323 | 0.346 | 0.372 | 0.387 | 0.403 | 0.450 | 0.493 |
| 72 | 0.173 | 0.206 | 0.246 | 0.261 | 0.274 | 0.299 | 0.322 | 0.345 | 0.371 | 0.386 | 0.402 | 0.449 | 0.491 |
| 73 | 0.170 | 0.204 | 0.244 | 0.259 | 0.273 | 0.297 | 0.320 | 0.344 | 0.369 | 0.384 | 0.401 | 0.447 | 0.489 |
| 74 | 0.167 | 0.201 | 0.242 | 0.257 | 0.271 | 0.295 | 0.318 | 0.342 | 0.368 | 0.382 | 0.399 | 0.445 | 0.486 |
| 75 | 0.164 | 0.199 | 0.240 | 0.255 | 0.269 | 0.293 | 0.317 | 0.340 | 0.366 | 0.380 | 0.397 | 0.442 | 0.483 |
| 76 | 0.160 | 0.196 | 0.237 | 0.253 | 0.267 | 0.291 | 0.314 | 0.338 | 0.363 | 0.378 | 0.394 | 0.439 | 0.480 |
| 77 | 0.157 | 0.193 | 0.235 | 0.250 | 0.264 | 0.289 | 0.312 | 0.335 | 0.361 | 0.375 | 0.391 | 0.436 | 0.477 |
| 78 | 0.154 | 0.190 | 0.232 | 0.248 | 0.262 | 0.287 | 0.310 | 0.333 | 0.358 | 0.373 | 0.389 | 0.433 | 0.473 |
| 79 | 0.151 | 0.187 | 0.230 | 0.245 | 0.259 | 0.284 | 0.307 | 0.330 | 0.356 | 0.370 | 0.386 | 0.430 | 0.469 |
| 80 | 0.147 | 0.184 | 0.227 | 0.243 | 0.257 | 0.282 | 0.305 | 0.328 | 0.353 | 0.367 | 0.383 | 0.427 | 0.466 |
| 81 | 0.144 | 0.182 | 0.225 | 0.241 | 0.254 | 0.279 | 0.302 | 0.325 | 0.350 | 0.364 | 0.380 | 0.423 | 0.462 |
| 82 | 0.141 | 0.179 | 0.222 | 0.238 | 0.252 | 0.277 | 0.300 | 0.323 | 0.348 | 0.362 | 0.377 | 0.420 | 0.458 |
| 83 | 0.138 | 0.176 | 0.220 | 0.236 | 0.250 | 0.275 | 0.298 | 0.321 | 0.345 | 0.359 | 0.375 | 0.417 | 0.455 |
| 84 | 0.135 | 0.174 | 0.218 | 0.234 | 0.248 | 0.273 | 0.296 | 0.319 | 0.343 | 0.357 | 0.372 | 0.414 | 0.451 |
| 85 | 0.132 | 0.171 | 0.216 | 0.232 | 0.246 | 0.271 | 0.294 | 0.316 | 0.341 | 0.354 | 0.370 | 0.411 | 0.448 |
| 86 | 0.130 | 0.169 | 0.214 | 0.230 | 0.244 | 0.269 | 0.292 | 0.314 | 0.339 | 0.352 | 0.367 | 0.409 | 0.445 |
| 87 | 0.127 | 0.167 | 0.212 | 0.228 | 0.242 | 0.267 | 0.290 | 0.312 | 0.337 | 0.350 | 0.365 | 0.406 | 0.442 |
| 88 | 0.125 | 0.165 | 0.210 | 0.226 | 0.240 | 0.265 | 0.288 | 0.311 | 0.335 | 0.348 | 0.363 | 0.404 | 0.439 |
| 89 | 0.123 | 0.163 | 0.208 | 0.224 | 0.238 | 0.263 | 0.286 | 0.309 | 0.333 | 0.346 | 0.361 | 0.401 | 0.436 |
| 90 | 0.121 | 0.161 | 0.206 | 0.222 | 0.237 | 0.262 | 0.285 | 0.307 | 0.331 | 0.344 | 0.359 | 0.398 | 0.433 |

Notes: Normalized HGS data are presented in kgf/kg.
